# Supplementary material
Source: PubMed Central journal article supplement (PMC8713787)
Supplement: pnas.2110633118.sapp.pdf [file pnas.2110633118.sapp.pdf]

# Screening Human Lung Cancer with Predictive Models of Serum Magnetic Resonance Spectroscopy Metabolomics

*Short Title: Lung Cancer Screening with Serum Metabolomics Models*

Tjada A. Schult<sup>1,2,†</sup>, Mara J. Lauer<sup>1,3,†</sup>, Yannick Berker<sup>4</sup>, Marcella R. Cardoso<sup>1</sup>, Lindsey A. Vandergrift<sup>1</sup>, Piet Habbel<sup>2</sup>, Johannes Nowak<sup>5</sup>, Matthias Taupitz<sup>2</sup>, Martin Aryee<sup>1</sup>, Mari A. Mino-Kenudson<sup>1</sup>, David C. Christiani<sup>1,6,\*</sup> and Leo L. Cheng<sup>1,\*</sup>

*1 Massachusetts General Hospital and Harvard Medical School, Boston, MA, USA*

*2 Charité Universitätsmedizin Berlin, corporate member of Freie Universität Berlin, Humboldt-Universität zu Berlin, and Berlin Institute of Health, Berlin, Germany*

*3 University of Würzburg (JMU), Würzburg, Germany*

*4 German Cancer Research Center (DKFZ), Heidelberg, Germany*

*5 Radiologische Praxis Gotha (SRH), Gotha, Germany*

*6 Harvard T.H. Chan School of Public Health, Boston, MA, USA*

† Authors with equal contributions

\* Correspondence:

David C. Christiani, MD, MPH

665 Huntington Ave. 1-1401, Boston, MA 02115, USA

[Christiani.david@mgh.harvard.edu](mailto:Christiani.david@mgh.harvard.edu) 617-432-3323

or

Leo L. Cheng, PhD

149 13<sup>th</sup> street, MGH, Charlestown, MA 02129, USA

[lcheng@mgh.harvard.edu](mailto:lcheng@mgh.harvard.edu) 617-724-6593

## Supplemental Materials

**Table S1. Demographic Data for the studied populations.**

| Training & Validation Cohort             |                |                 |                |                |                 |                |                |                 |                |            |       |       |                |                 |                |                |                 |                | TOTAL          |                 |                |
|------------------------------------------|----------------|-----------------|----------------|----------------|-----------------|----------------|----------------|-----------------|----------------|------------|-------|-------|----------------|-----------------|----------------|----------------|-----------------|----------------|----------------|-----------------|----------------|
| Gender                                   | FEMALE         |                 |                |                |                 |                |                |                 |                | MALE       |       |       |                |                 |                |                |                 |                | TOTAL          |                 |                |
| Smoking habit                            | Non-Smoker     |                 |                | Former Smoker  |                 |                | Smoker         |                 |                | Non-Smoker |       |       | Former Smoker  |                 |                | Smoker         |                 |                | TOTAL          |                 |                |
| Cell Type                                | N              | Age             | Prior          | N              | Age             | Prior          | N              | Age             | Prior          | N          | Age   | Prior | N              | Age             | Prior          | N              | Age             | Prior          | N              | Age             | Prior          |
|                                          | CHI*           | (yrs)           | (yrs)          | CHI            | (yrs)           | (yrs)          | CHI            | (yrs)           | (yrs)          | CHI        | (yrs) | (yrs) | CHI            | (yrs)           | (yrs)          | CHI            | (yrs)           | (yrs)          | CHI            | (yrs)           | (yrs)          |
| Localized Disease (Stage I & IIa)        |                |                 |                |                |                 |                |                |                 |                |            |       |       |                |                 |                |                |                 |                |                |                 |                |
| Adeno CA                                 | 3              | 65.5±3.4        | 3.5±1.1        | 5              | 65.9±3.3        | 3.6±1.4        | 1              | 65.4            | 3.7            |            |       |       |                |                 |                | 9              | 65.7±3.6        | 3.6±1.1        |                |                 |                |
| Ctrl                                     | 2.3±0.6        | 65.0±4.6        |                | 2.0±0.0        | 65.4±4.0        |                | 2              | 65.0            |                |            |       |       |                |                 |                | 2.1±0.3        | 65.2±3.7        |                |                |                 |                |
| SCC                                      | 1              | 67.5            | 4.3            | 1              | 68.2            | 3.2            |                |                 |                |            |       |       | 1              | 70.0            | 1.6            | 3              | 68.6±1.3        | 3.0±1.4        |                |                 |                |
| Ctrl                                     | 2              | 67.0            |                | 2              | 68.0            |                |                |                 |                |            |       |       | 3              | 70.0            |                | 2.3±0.6        | 68.3±1.5        |                |                |                 |                |
| Mix                                      |                |                 |                |                |                 |                | 1              | 65.7            | 3              |            |       |       |                |                 |                | 1              | 65.7            | 3              |                |                 |                |
| Ctrl                                     |                |                 |                |                |                 |                | 2              | 65.0            |                |            |       |       |                |                 |                | 2              | 65              |                |                |                 |                |
| Advanced Disease (Stage IIB, III, & IV)  |                |                 |                |                |                 |                |                |                 |                |            |       |       |                |                 |                |                |                 |                |                |                 |                |
| Adeno CA                                 |                |                 |                | 3              | 70.1±3.6        | 2.0±2.1        |                |                 |                |            |       |       | 2              | 67.0±1.5        | 3.2±1.7        | 1              | 63.5            | 3.8            | 6              | 68.0±3.6        | 2.0±1.5        |
| Ctrl                                     |                |                 |                | 2.3±0.6        | 69.7±4.0        |                |                |                 |                |            |       |       | 2.0±0.0        | 66.5±2.1        |                | 2              | 63.0            |                | 2.2±0.4        | 67.5±3.8        |                |
| SCC                                      |                |                 |                |                |                 |                |                |                 |                |            |       |       | 2              | 71.2±2.0        | 2.0±0.6        |                |                 |                | 2              | 71.2±2.0        |                |
| Ctrl                                     |                |                 |                |                |                 |                |                |                 |                |            |       |       | 2.5±0.7        | 70.5±2.1        |                |                |                 |                | 2.6±0.7        | 70.5±2.1        |                |
| Mix                                      |                |                 |                | 1              | 51.4            | 2.3            |                |                 |                |            |       |       | 1              | 55.6            | 0.7            |                |                 |                | 2              | 53.5±3.0        | 1.5±1.1        |
| Ctrl                                     |                |                 |                | 1              | 51.0            |                |                |                 |                |            |       |       | 1              | 55.0            |                |                |                 |                | 1.0±0.0        | 53.0±2.8        |                |
| Pathological Stage & Cell Type Unknown** |                |                 |                |                |                 |                |                |                 |                |            |       |       |                |                 |                |                |                 |                |                |                 |                |
| Ctrl                                     |                |                 |                | 1              | 80.7            | 1.4            | 1              | 72.3            | 0.5            |            |       |       |                |                 |                | 2              | 76.5±6.0        | 1.0±0.6        |                |                 |                |
|                                          |                |                 |                | 4              | 80.0            |                | 3              | 72.0            |                |            |       |       |                |                 |                | 3.6±0.7        | 76.0±5.7        |                |                |                 |                |
| <b>Total</b>                             | <b>4</b>       | <b>66.0±3.8</b> | <b>3.7±0.9</b> | <b>11</b>      | <b>67.3±7.4</b> | <b>2.8±1.6</b> | <b>3</b>       | <b>67.8±3.9</b> | <b>2.4±1.7</b> |            |       |       | <b>5</b>       | <b>66.4±5.5</b> | <b>2.2±1.4</b> | <b>2</b>       | <b>66.8±4.6</b> | <b>2.7±1.6</b> | <b>25</b>      | <b>66.9±5.9</b> | <b>2.8±1.4</b> |
|                                          | <b>2.3±0.5</b> | <b>65.5±3.9</b> |                | <b>2.2±0.8</b> | <b>66.8±7.5</b> |                | <b>2.3±0.6</b> | <b>67.3±4.0</b> |                |            |       |       | <b>2.0±0.7</b> | <b>65.8±5.5</b> |                | <b>2.6±0.7</b> | <b>66.5±4.9</b> |                | <b>2.2±0.6</b> | <b>66.4±5.9</b> |                |

| Testing Cohort                          |                |                  |                |                |                 |                |                |                 |                |                |                  |                |                |                 |                |                |                 |                | TOTAL          |                 |                |
|-----------------------------------------|----------------|------------------|----------------|----------------|-----------------|----------------|----------------|-----------------|----------------|----------------|------------------|----------------|----------------|-----------------|----------------|----------------|-----------------|----------------|----------------|-----------------|----------------|
| Gender                                  | FEMALE         |                  |                |                |                 |                |                |                 |                | MALE           |                  |                |                |                 |                |                |                 |                | TOTAL          |                 |                |
| Smoking habit                           | Non-Smoker     |                  |                | Former Smoker  |                 |                | Smoker         |                 |                | Non-Smoker     |                  |                | Former Smoker  |                 |                | Smoker         |                 |                | TOTAL          |                 |                |
| Cell Type                               | N              | Age              | Prior          | N              | Age             | Prior          | N              | Age             | Prior          | N              | Age              | Prior          | N              | Age             | Prior          | N              | Age             | Prior          | N              | Age             | Prior          |
|                                         | CHI*           | (yrs)            | (yrs)          | CHI            | (yrs)           | (yrs)          | CHI            | (yrs)           | (yrs)          | CHI            | (yrs)            | (yrs)          | CHI            | (yrs)           | (yrs)          | CHI            | (yrs)           | (yrs)          | CHI            | (yrs)           | (yrs)          |
| Localized Disease (Stage I & IIa)       |                |                  |                |                |                 |                |                |                 |                |                |                  |                |                |                 |                |                |                 |                |                |                 |                |
| Adeno CA                                | 5              | 63.1±12.5        | 0.4±0.6        | 6              | 67.5±10.4       | 0.9±0.8        | 4              | 60.1±6.5        | 0.6±0.4        | 2              | 57.3±9.2         | 0.4±0.4        | 2              | 66.7±1.5        | 0.8±1.1        | 1              | 54.3            | <0.1           | 20             | 63.2±9.5        | 0.6±0.6        |
| Ctrl                                    | 2.0±1.2        | 62.4±12.4        |                | 2.0±0.9        | 64.5±8.8        |                | 1.3±0.5        | 58.0±5.1        |                | 1.5±0.7        | 56.5±9.2         |                | 2.0±0.0        | 66.0±1.4        |                | 1              | 53.0            |                | 1.8±0.9        | 61.5±8.7        |                |
| SCC                                     | 1              | 65.5             | 0.1            |                |                 |                | 3              | 72.0±10.3       | 0.8±0.6        | 1              | 74.7             | 1.1            |                |                 |                |                |                 |                | 6              | 71.2±9.0        | 0.7±0.5        |
| Ctrl                                    | 2              | 65.0             |                |                |                 |                | 3.0±1.0        | 70.3±8.0        |                | 3              | 74.0             |                |                |                 |                |                |                 |                | 2.8±0.8        | 70.0±6.5        |                |
| Mix                                     |                |                  |                | 2              | 67.2±1.9        | <0.1           |                |                 |                |                |                  |                |                |                 |                |                |                 |                | 2              | 67.2±1.9        | <0.1           |
| Ctrl                                    |                |                  |                | 2.0±0.0        | 65.5±2.1        |                |                |                 |                |                |                  |                |                |                 |                |                |                 |                | 2.0±0.0        | 65.5±2.1        |                |
| Advanced Disease (Stage IIB, III, & IV) |                |                  |                |                |                 |                |                |                 |                |                |                  |                |                |                 |                |                |                 |                |                |                 |                |
| Adeno CA                                | 3              | 61.1±11.2        | 1.7±1.2        | 8              | 67.9±9.2        | 2.4±0.9        | 5              | 58.0±4.9        | 0.5±0.3        | 2              | 68.4±5.4         | 0.9±1.1        | 2              | 67.5±1.2        | 1.0±0.4        | 2              | 61.8±5.2        | 0.8±0.1        | 22             | 64.2±9.1        | 0.6±0.5        |
| Ctrl                                    | 1.7±1.2        | 60.7±11.0        |                | 2.4±0.9        | 66.5±9.3        |                | 1.2±0.4        | 56.8±4.5        |                | 2.5±0.7        | 68.0±5.7         |                | 2.0±0.0        | 67.0±1.4        |                | 1.5±0.7        | 60.5±3.5        |                | 1.9±0.9        | 63.1±8.1        |                |
| SCC                                     |                |                  |                | 2              | 53.6±9.9        | 0.4±0.5        | 1              | 70.9            | 1              | 1              | 51.5             | <0.1           |                |                 |                |                |                 |                | 5              | 58.6±9.6        | 0.3±0.5        |
| Ctrl                                    |                |                  |                | 1.0±1.4        | 53.0±11.3       |                | 2              | 68.0            |                | 1              | 51.0             |                |                |                 |                | 2              | 61.0            |                | 1.4±0.9        | 57.2±9.1        |                |
| <b>Total</b>                            | <b>9</b>       | <b>62.7±10.5</b> | <b>0.3±0.5</b> | <b>18</b>      | <b>66.1±9.7</b> | <b>0.6±0.6</b> | <b>13</b>      | <b>62.9±8.6</b> | <b>0.7±0.4</b> | <b>6</b>       | <b>62.9±10.1</b> | <b>0.6±0.7</b> | <b>4</b>       | <b>67.1±1.2</b> | <b>0.9±0.7</b> | <b>4</b>       | <b>60.3±5.0</b> | <b>0.4±0.5</b> | <b>54</b>      | <b>64.0±9.9</b> | <b>0.6±0.5</b> |
|                                         | <b>1.9±1.1</b> | <b>62.1±10.4</b> |                | <b>2.1±0.9</b> | <b>64.2±9.1</b> |                | <b>1.7±0.9</b> | <b>61.2±7.8</b> |                | <b>2.0±0.9</b> | <b>62.3±10.1</b> |                | <b>2.0±0.0</b> | <b>66.5±1.3</b> |                | <b>1.6±0.6</b> | <b>58.8±4.3</b> |                | <b>1.9±0.9</b> | <b>62.7±9.4</b> |                |

\*CHI = Charlson Health Index of matched Controls.

\*\*For these patients there is an absence of pathology data.

Prior: Years of biobank samples PriorDx. Adeno Ca: Adenocarcinomas. SCC: Squamous cell carcinomas.

Mix: Mixed cell type cancer. Ctrl: Healthy controls.

**Table S2. HRMAS MRS spectral regions, their potential contributing metabolites, means and standard deviations of these regions measured from the training cohort, and their overall coefficients in the calculation of the reported canonical score from the included principal components.**

| Spectral Regions | Possible Metabolites                     | Mean     | SD       | Coeff   | Coeff*Mave |
|------------------|------------------------------------------|----------|----------|---------|------------|
| 4.35-4.34        | AMP,GDP,GTP,NAD,NADP                     | 0.000697 | 0.000692 | 216.682 | 0.151      |
| 4.33-4.27        | 4,ATP,GDP,GPC,GTP,NADP,Thr               | 0.005243 | 0.002107 | 97.031  | 0.509      |
| 4.26-4.24        | F6P,GDP,GTP,NAD,NADP,Thr                 | 0.002019 | 0.001031 | 33.539  | 0.068      |
| 4.16-4.08        | 3,ADP,F6P,GDP,Lac,Pro                    | 0.022348 | 0.013978 | -18.016 | -0.403     |
| 4.07-4.05        | 9,ADP,DPG,G6P,m-Ino,Trp                  | 0.002843 | 0.001567 | -87.622 | -0.249     |
| 4.02-3.99        | 1,1,5-AG,3PG,AMP,Asn,DPG,G6P,His,IMP,Phe | 0.004071 | 0.003635 | -45.822 | -0.187     |
| 3.98-3.96        | 1,5-AG,Asn,F6P,G6P,His,MH,Phe,Ser        | 0.004067 | 0.002264 | 5.120   | 0.021      |
| 3.95-3.93        | 1,5-AG,F6P,G6P,GPC,MH,Ser,Tyr            | 0.003168 | 0.002229 | -11.615 | -0.037     |
| 3.92-3.91        | Cr,F6P,G6P,GPC,Ser,Tyr                   | 0.015964 | 0.004352 | -6.256  | -0.100     |
| 3.90-3.89        | 5,1,5-AG,3PG,Asp,F6P,G6P,Glc,GPC         | 0.021959 | 0.005614 | -4.435  | -0.097     |
| 3.88-3.87        | 3PG,Asp,F6P,G6P,Glc,GPC                  | 0.002068 | 0.001847 | 17.412  | 0.036      |
| 3.86-3.82        | 3,1,5-AG,3PG,ALC,F6P,Glc,GPC,Met,Ser     | 0.041386 | 0.010788 | -2.765  | -0.114     |
| 3.81-3.76        | 3,8,Ala,Arg,Glc,Gln,Glu,GSSG,Lys,Orn,    | 0.035509 | 0.007736 | -13.041 | -0.463     |
| 3.75-3.73        | 3,8,Ala,Arg,G6P,Glc,Gln,Glu,GSSG,Leu,Lys | 0.023198 | 0.006620 | 11.025  | 0.256      |
| 3.72-3.71        | 3,G6P,Glc,Leu                            | 0.024683 | 0.012891 | -6.001  | -0.148     |
| 3.70-3.67        | 1,5-AG,F6P,G6P,Glc,GPC,Leu,MH            | 0.011983 | 0.006237 | -24.535 | -0.294     |
| 3.66-3.64        | 1,5-AG,F6P,GPC,Ile                       | 0.008435 | 0.003978 | -35.667 | -0.301     |
| 3.63-3.60        | 1,5-AG,ALC,F6P,GPC,m-Ino,Val             | 0.006411 | 0.001936 | -16.570 | -0.106     |
| 3.59-3.56        | 1,1,5-AG,ALC,F6P,G6P,GPC,Thr             | 0.009371 | 0.004042 | 11.072  | 0.104      |
| 3.55-3.52        | F6P,G6P,Glc,m-Ino                        | 0.021868 | 0.006409 | -7.029  | -0.154     |
| 3.51-3.49        | G6P,Glc,m-Ino,Trp                        | 0.015213 | 0.006238 | 0.719   | 0.011      |
| 3.48-3.45        | G6P,Glc,Trp                              | 0.042398 | 0.014055 | -1.440  | -0.061     |
| 3.44-3.43        | 1,5-AG,Glc,Pro,Tau                       | 0.003928 | 0.001641 | 26.229  | 0.103      |
| 3.42-3.40        | 1,10,11,1,5-AG,Glc,Pro,Tau               | 0.040611 | 0.012635 | -1.913  | -0.078     |
| 3.39-3.38        | Glc,Pro                                  | 0.006539 | 0.004436 | -12.749 | -0.083     |
| 3.37-3.32        | 1,5-AG,2,GSSG,Pro                        | 0.005504 | 0.002623 | 46.543  | 0.256      |
| 3.27-3.26        | 1,5-AG,7,G6P,His,m-Ino,Phe,Tau,Trp       | 0.013070 | 0.005658 | -8.594  | -0.112     |
| 3.25-3.21        | 5,7,10,1,5-AG,Arg,Glc,His,m-Ino,Phe,Tau, | 0.080753 | 0.020492 | 8.392   | 0.678      |
| 3.15-3.14        | 8,11,His,MH                              | 0.001398 | 0.001144 | -       | -0.206     |
| 3.12-3.11        | 8,Phe                                    | 0.001238 | 0.001794 | -59.334 | -0.073     |
| 3.07-2.99        | 7,9,2-OG,Cr,Lys,MH,Orn,Tyr               | 0.017550 | 0.004119 | 32.713  | 0.574      |
| 2.94-2.92        | Asn,GSSG                                 | 0.002232 | 0.001023 | 169.321 | 0.378      |
| 2.91-2.88        | TBD                                      | 0.002257 | 0.001427 | 155.687 | 0.351      |

|           |                       |          |          |         |        |
|-----------|-----------------------|----------|----------|---------|--------|
| 2.84-2.83 | Asn                   | 0.000937 | 0.000922 | 225.851 | 0.212  |
| 2.81-2.80 | Asp,G3P               | 0.001618 | 0.001532 | 62.998  | 0.102  |
| 2.79-2.71 | 7,Asp                 | 0.010576 | 0.003605 | 54.339  | 0.575  |
| 2.70-2.68 | 4,7,Asp               | 0.002685 | 0.000839 | 14.861  | 0.040  |
| 2.67-2.66 | 4,7,Asp,Cit           | 0.000926 | 0.000532 | -       | -0.115 |
| 2.48-2.40 | 10,2-OG,ALC,Gln,GSSG  | 0.013154 | 0.003326 | -10.582 | -0.139 |
| 2.39-2.32 | 4,Gln,Glu,Pro,Suc     | 0.008611 | 0.003089 | -32.737 | -0.282 |
| 2.31-2.22 | Glu,Met,Pro,Val       | 0.016407 | 0.005115 | 3.945   | 0.065  |
| 2.16-2.11 | ALC,Gln,Glu,GSSG,Met  | 0.015458 | 0.002328 | -28.635 | -0.443 |
| 2.09-2.07 | 6,Gln,Glu,Met,Pro     | 0.009938 | 0.003045 | -29.547 | -0.294 |
| 2.06-1.99 | Glu,Ile,Pro           | 0.051105 | 0.013603 | 5.663   | 0.289  |
| 1.94-1.88 | 8,Arg,Ile,Lys,Orn,Pro | 0.007918 | 0.002073 | 62.756  | 0.497  |
| 1.75-1.69 | Arg,Leu,Lys,Orn       | 0.009426 | 0.002173 | 28.872  | 0.272  |
| 1.62-1.55 | 8,Arg                 | 0.009396 | 0.006181 | 25.258  | 0.237  |
| 1.54-1.53 | 8,Lys                 | 0.001267 | 0.001057 | -13.664 | -0.017 |
| 1.52-1.45 | 8,Ala,Ile,Lys         | 0.016822 | 0.003311 | 20.462  | 0.344  |
| 1.35-1.34 | TBD                   | 0.040360 | 0.029587 | -6.954  | -0.281 |
| 1.33-1.32 | Lac,Thr               | 0.055574 | 0.030118 | -8.471  | -0.471 |
| 1.31-1.27 | Ile,Lac,Thr           | 0.084620 | 0.061008 | 2.311   | 0.196  |
| 1.06-1.03 | Val                   | 0.007862 | 0.001853 | 10.980  | 0.086  |
| 1.02-1.01 | Val                   | 0.001967 | 0.001805 | 48.495  | 0.095  |
| 1.00-0.98 | Ile,Val               | 0.009306 | 0.002900 | 20.223  | 0.188  |
| 0.97-0.92 | Ile,Leu,Val           | 0.024732 | 0.005288 | 23.169  | 0.573  |
| 0.91-0.84 | Ile                   | 0.099356 | 0.021767 | 10.720  | 1.065  |
|           |                       |          |          |         |        |
|           |                       |          |          | Label   |        |
|           | Caffeine              |          |          | 1       |        |
|           | 1,7-Dimethyl-xanthine |          |          | 2       |        |
|           | Glycerate             |          |          | 3       |        |
|           | Malate                |          |          | 4       |        |
|           | Betaine               |          |          | 5       |        |
|           | Dimethyl-proline      |          |          | 6       |        |
|           | Carnosine             |          |          | 7       |        |
|           | Citrulline            |          |          | 8       |        |
|           | Creatinine            |          |          | 9       |        |
|           | Carnitine             |          |          | 10      |        |
|           | Ergothioneine         |          |          | 11      |        |
|           |                       |          |          |         |        |

|  |                            |  |  |        |  |
|--|----------------------------|--|--|--------|--|
|  | Diphospho-glycerate        |  |  | DPG    |  |
|  | Fructose-6-phosphate       |  |  | F6P    |  |
|  | Glucose-6-phosphate        |  |  | G6P    |  |
|  | Glyceraldehyde-3-phosphate |  |  | G3P    |  |
|  | 3-Phosphoglycerate         |  |  | 3PG    |  |
|  | 1,5-Anhydroglucitol        |  |  | 1,5-AG |  |
|  | Glucose                    |  |  | Glc    |  |
|  | 2-Oxoglutarate             |  |  | 2-OG   |  |
|  | Succinate                  |  |  | Suc    |  |
|  | Methyl-histidine           |  |  | MH     |  |
|  | Ornithine                  |  |  | Orn    |  |
|  | Acetyl-carnitine           |  |  | ALC    |  |
|  | Glycerophosphocholine      |  |  | GPC    |  |
|  | Glutathione disulfide      |  |  | GSSG   |  |

Coeff: The overall loading factors based on principal component and canonical analyses conducted with the training cohort.  $Coeff * M_{ave}$ : Contributing overall loading factors for each spectral region weighted by the mean of the region calculated from the Training cohort. Red colored regions: larger than the median contribution towards NSCLC; Green colored regions: larger than the median contribution towards Healthy controls.

**Table S3. Co-variance analyses of the canonical score against the following potential co-variances.**

| <b>Variance</b>                           | <b>Nparm</b> | <b>DF</b> | <b>Sum of Squares</b> | <b>F Ratio</b> | <b>Prob &gt; F</b>     |
|-------------------------------------------|--------------|-----------|-----------------------|----------------|------------------------|
| Days between biobank sample and diagnosis | 1            | 1         | 0.26042               | 0.243235       | <b><i>0.624389</i></b> |
| Age at first serum sample                 | 1            | 1         | 0.071566              | 0.066843       | <b><i>0.797224</i></b> |
| Gender                                    | 1            | 1         | 0.706995              | 0.660339       | <b><i>0.420917</i></b> |
| Smoker status                             | 2            | 2         | 1.416581              | 0.66155        | <b><i>0.521224</i></b> |
